# Supplementary material for: The Marine Mammal Class II Major Histocompatibility Complex Organization
Source: Front Immunol. 2019 Apr 4;10:696. doi: 10.3389/fimmu.2019.00696 (PMC6459222; doi:10.3389/fimmu.2019.00696)
Supplement: Supplementary file 1 [file Table_1.XLSX]

## Sheet: Assembly reports
Species	Lineage	Clade	Submitter	Year	Assembly Accesion	Nº Scaffolds MHC	Sequencing Technology	Assembly method	How	Genome Coverage	Scaffold N50
Bos taurus	Boreoeutheria	Cetartiodactyla	USDA ARS	2011	GCF_002263795.1	1	PacBio; Illumina NextSeq 500; Illumina HiSeq; Illumina GAII	Falcon v. FEB-2016	De novo	80.0x	103308737
Balaenoptera acutorostrata	Boreoeutheria	Cetacea (Mysticeti)	Korean Ocean Research & Development Institute	2013	GCF_000493695.1	3	Illumina HiSeq 2000	SOAPdenovo v. 16-Mar-2012	De novo	92x	12843668
Delphinapterus leucas	Boreoeutheria	Cetacea (Odontoceti)	BC Cancer Agency	2017	GCF_002288925.1	1	Illumina HiSeqX	ABySS - Supernova hybrid v. 2.0.1 - 1.1.5	De novo	117.0x	19885328
Lipotes vexillifer	Boreoeutheria	Cetacea (Odontoceti)	BGI	2013	GCF_000442215.1	3	Illumina Hiseq 2000	SOAPdenovo v. 2.01	De novo	115x	2419148
Neophocaena asiaeorientalis	Boreoeutheria	Cetacea (Odontoceti)	Nanjing normal university	2018	GCF_003031525.1	2	Illumina HiSeq2000	SOAPdenovo v. 2.39	De novo	106x	6341296
Orcinus orca	Boreoeutheria	Cetacea (Odontoceti)	Marine mammals	2013	GCF_000331955.2	2	Illumina HiSeq	AllPaths v. 41070; ATLAS-link v. 1.0; ATLAS-gapfill v. 2.2	De novo	200.0x	12735091
Lagenorhynchus obliquidens	Boreoeutheria	Cetacea (Odontoceti)	Canada's Genomic Enterprise	2018	GCF_003676395.1	1	Illumina HiSeq	supernova v. 2.1.1	De novo	35.68x	28371583
Tursiops truncatus	Boreoeutheria	Cetacea (Odontoceti)	National Institute of Standards and Technology	2016	GCF_001922835.1	2	Illumina HiSeq	Meraculous v. 2.2.2.5; HiRise v. 1.3.0-116-gf50c3ce	De novo	114.5x	26555543
Physeter catodon	Boreoeutheria	Cetacea (Odontoceti)	BGI	2017	GCF_002837175.1	1	BGISEQ-500	SOAPdenovo v. SEP-2017.; ARCS pipeline v. SEP-2017; Supernova v. SEP-2017	De novo	248x	37183148
Callorhinus ursinus	Boreoeutheria	Pinniped (Otariidae)	Canada's Genomic Enterprise	2018	GCF_003265705.1	3	Illumina HiSeq	supernova v. 2.0.1	De novo	27.44x	31506801
Neomonachus schauinslandi	Boreoeutheria	Pinniped (Phocidae)	Johns Hopkins University	2017	GCF_002201575.1	2	Illumina HiSeq	RefAligner v. 5122; Supernova v. 1.1	De novo	61.0x	29518589
Leptonychotes weddellii	Boreoeutheria	Pinniped (Phocidae)	Broad Institute	2013	GCF_000349705.1	3	Illumina HiSeq	allpaths v. R41856 HAPLOIDIFY=True	De novo	82x	904031
Odobenus rosmarus	Boreoeutheria	Pinniped (Odobenidae)	Marine mammals	2013	GCF_000321225.1	3	Illumina	AllPaths v. 41070; Atlas-link v. 1.0; Atlas-gapfill v. 2.2	De novo	200.0x	2616778
Canis lupus familiaris	Boreoeutheria	Carnivora	Dog Genome Sequencing Consortium	2011	GCF_000002285.3	1	Sanger	Arachne v. April 2010	De novo	7x plus >90Mb finished sequence	45876610
Mus musculus	Boreoeutheria	Glires	Genome Reference Consortium	2017	GCF_000001635.26	1	http://genomereference.org	http://genomereference.org	http://genomereference.org	http://genomereference.org	54517951
Pteropus alecto	Boreoeutheria	Chiroptera	BGI	2013	GCF_000325575.1	1	Illumina HighSeq 2000	SOAPdenovo v. 1.06	De novo	110x	15954802
Equus caballus	Boreoeutheria	Perissodactyla	University of Louisville	2018	GCF_002863925.1	1	Sanger; Illumina HiSeq; PacBio	Celera Assembler v. 2017; HiRise v. 2017	De novo	88.0x	87230776
Loxodonta africana	Afrotheria	Proboscidae	Broad Institute	2009	GCF_000001905.1	9	Sanger / BAC	Arachne	De novo	7x (~200kb BAC end reads)	46401353
Trichechus manatus	Afrotheria	Sirenia	Broad Institute	2012	GCF_000243295.1	8	Illumina Hi-seq	AllPaths	De novo	150x	14442683
Orycteropus afer	Afrotheria	Tubulidentata	Broad Institute	2012	GCF_000298275.1	5	Illumina Hi-seq	AllPaths	De novo	44x	7875832
Elephantulus edwardii	Afrotheria	Macroscelidae	Broad Institute	2012	GCF_000299155.1	1	Illumina Hi-seq	AllPaths	De novo	62x	15011382
Chrysochloris asiática	Afrotheria	Chrysochloridae	Broad Institute	2012	GCF_000296735.1	1	Illumina Hi-seq	AllPaths	De novo	66x	13470186
Echinops telfairi	Afrotheria	Tenrecidae	Broad Institute	2012	GCF_000313985.1	3	Illumina Hi-Seq	AllPaths	De novo	78x	45764842
