# Supplementary material for: The Marine Mammal Class II Major Histocompatibility Complex Organization
Source: Front Immunol. 2019 Apr 4;10:696. doi: 10.3389/fimmu.2019.00696 (PMC6459222; doi:10.3389/fimmu.2019.00696)
Supplement: Supplementary file 9 [file Data_Sheet_7.FASTA]

>Baac-DRB_LOC103007035_na Balaenoptera acutorostrata scammoni unplaced genomic scaffold, BalAcu1.0 scaffold699, whole genome shotgun sequence
MVSLYFSGGSWMAALTVILMVLSPPLAWARETQ------------------------------------------------------------------------------------------LAPTVTVYPAKTQPLQHHNLLVCSVNGFYPGHIEVRWFRNGQEEEAGVVSTGLIPNGDWTFQTMVMLETVPQSGEVYTCHVEHPSRTSPLTVEWRAQSESAQSKMMSGIGGFVLGLLFLGVGLFIYFRNQKGHSGLQP---------------------------------------------------TGLLS-----------------------------------------------------------
>Baac-DRB_LOC103007535_IIa LOC103007535: DLA class II histocompatibility antigen, DR-1 beta chain-like
MVSLYFSGGSWMAALTVILMVLSPPLAWARETQQDFLYQFKGYCYFTNGTERVRYVTRYIYNREEYARFDSDVGEYRAVSELGRPDAKYWNSQKD----------------------------VAPTVTVYPAKTQPLQHHNLLVCSVNGFYPGHIEVRWFRNGQEEEAGVVSTGLIPNGDWTFQTMVMLETVPQSGEVYTCHVEHPSRTSPLTVEWRAQSESAQSKMMSGIGGFVLGLLFLGVGLFIYFRNQKGHSGLQP---------------------------------------------------TGLLS-----------------------------------------------------------
>BoLA-DRB2_538700_IIa BOLA-DRB2: histocompatibility complex, class II, DR beta 2
-----------MAALAVLLMVLSLPFSWARETQPHFIHQFKGECRFSNGLERMRFFARYIYNTQEDVHFDSDVGEFTALTELGRLDAEYWNQQKDFMEQMRAKVDTLCRSNYQGIGSFLRQRRVEPTVTVYPAKTQPLQHHNLLVCSVNGFYPGHIEVRWFWNSHEEEAGVISTGLIQNGDWTFQTMVMLETVPQSGEVYTCQVEHPSRTSPLTVEWRAQSDSAQRKLMSGIGGFVLGLLFLGVGLFIHLRSKKGHPALQPIVEPTVTVYPAKTQPLQHNHLLVCSVNGFYLGHVEVRWFWKGQEEEAGVISTGLIQNGDWTFETIVMLETVLQSGEVYTCQLEHPSWRSPIAEEWSEKLSISYVPHPPWMGLLYP
>BoLA-DRB3_282530_IIa BOLA-DRB3: major histocompatibility complex, class II, DRB3
MVCLYFSGGSWMAALIVMLMVLCPPLAWAREIQPHFLEYYKRECHFFNGTERVRFLDRYFHNGEEYVRFDSDWGEYRAVTELGQRVAEYCNSQKDFLERARAAVDTYCRHNYGVGESFTVQRRVEPIVTVYPAKTQPLQHHNLLVCSVNGFYPGHIEVRWFRNGHEEEAGVISTGLIQNGDWTFQTMVMLETVPQSGEVYTCQVEHPSRTSPITVEWRARSDSAQSKMMSGVGGFVLGLLFLAVGLFIYFRNQKGHPTLQP---------------------------------------------------TGLLS-----------------------------------------------------------
>Caur-DRB_LOC112816038_nt LOC112816038: DLA class II histocompatibility antigen, DR-1 beta chain
MLCLCFLGGSWMTALTLILMVLSPPLAWARDTPPHFLELFKAECHYSNGTERVRFLVRYIYNREEFVRFDSDVGEFRPVTELGRPDAEHWNRQKDVVEQKRAAVDTVCRHNYGVGESFTVQRRVEPTVTVYPTKTQPLQHHNLLVCSVNGFYPGHIEVRWFRNGQEEEAGVVSTGLIQNGDWTFQTLVMLEIVPQSGEVYTCQVEHPSLMSPVTVEWRAQSESAQSKMLSGIGGFVLGLLFLVVGLVIYFRNQKGHSGLQP---------------------------------------------------TGLLS-----------------------------------------------------------
>Chas-DRB_LOC102830563_tr2 Chrysochloris asiatica unplaced genomic scaffold, ChrAsi1.0 scaffold00038, whole genome shotgun sequence
----------------MILMVLSPPLALSRDNQPRFLEQGKAECHFTNGTERVRFLDRYIHNREEYVRFDSDLGKLVAVTELGRPNTEYGNRREDYLEQARAAVDTVCRHNYGIFESFTVQRRVEPLVTVYPSKTEPLKHHTLLVCSVNGFYPGHIEVRWFRNGQEEEAGVVSTGLIQNGDWTFQTLVMLETIPQSGEVYTCHVEHPSLTSPITVEWRAQSESAQSKMLSGIGGFVLGLLFLGAGLFIYVRNQKGHSGLQP---------------------------------------------------TGLLS-----------------------------------------------------------
>Chas-DRB_newlocus3_tr2 Chrysochloris asiatica unplaced genomic scaffold, ChrAsi1.0 scaffold00038, whole genome shotgun sequence
-------------------------------------------------------------------------------------------------------------------------------------------------------------VRWFRNGQEEEAGVVSTGLIQNGDWTFQTLVMLETIPQSGEVYTCHVEHPSLTSPITVEWRAQSESAQSKMLSGIGGFVLGLLFLGAGLFIYFRNQKGHSGLQP---------------------------------------------------T---------------------------------------------------------------
>Dano-DRB_LOC101437751_nt LOC101437751: HLA class II histocompatibility antigen, DRB1-4 beta chain-like
MV-----DDPWMAALTLTMMMLSPPLTLAKETEPHFVEQGKSECRFSNGTERVRYLQRYIYNREEYARYDSDVGLYVAVTELGRPDAEYWNSQEDLLEERRAAVDRFCRHNYGVGESFLVQRRVEPLVAVYPAKPQPLQRHSLLVCAVSGFYPGSIEVRWLRNGQEEEAGVVSTGLIRNGDWTFQILVMLEAVPQSGDVYTCHVEHPSRESPLTVEWRAQAASAQSKLLSGVGGFVLGLLFLGVGLYVHCRRQKGQSGLQP---------------------------------------------------TGLLS-----------------------------------------------------------
>Dele-DRB_LOC111178928_IIa LOC111178928: DLA class II histocompatibility antigen, DR-1 beta chain-like
MVSLYFSGRSWMAALTVILMVLSPPLAWARETQSLFMFRFKSECRFSNGTERVQLVDRYIYNGEEYVRYDSDVGEYRAETELGRRTAEYWNSQKDLLEQNRAALDTYCRHNYGVVESFTVQRRVAPTVTVYPAKTQPLQHHNLLVCSVNGFYPGHIEVRWFRNGQEEEAGVVSTGLIRNGDWTFQTMVMLETVPQSGEVYTCHVEHPSRTSPVTVEWRAQSESAQSKMLSGIGAFVLGLLFLGVGLFIYFRNQKGHSGLQP---------------------------------------------------TGLLN-----------------------------------------------------------
>Dele-DRB_LOC111178929_IIa Delphinapterus leucas isolate GAN/ISIS: 26980492/103006 unplaced genomic scaffold, ASM228892v2 scaffoldscaf27, whole genome shotgun sequence
---------------------------------ENFLLQFKSYCYFTKGTERVRYMTRHIYNGEEYVRFDSDVGEYRTVTELGRRTAEYWNSQKDLLEQKQAKADTYCRHNYGAVECFTVQRRVAPTVTVYPAKTQPLQHHNLLVCSVNGFYPGHIEVRWFRNGQEEEAGVVSTGLIRNGDWTFQTMVMLETVPQSGEVYTCHVEHPSRTSPVTVEWRAQSECAQSKMLSETGGFVLGLLFLGVGLFIYFRNQKEHPALQP---------------------------------------------------TGLLR-----------------------------------------------------------
>DLA-DRB_474860_nt HLA-DRB1: MHC class II DLA DRB1 beta chain
MVCLCFLGGSWMTALMLILMVLNPPLAWARDTPPHFVYQFKPECHFTNGTERVRFVERHIHNREEFVRFDSDVGEYRAVTELGRPDAESWNGQKELLEQERATVDTYCRHNYGVIESFTVQRRVEPTVTVYPTKTQTLQHHNLLVCSVNGFYPGHIEVRWLRNGQEEEAGVVSTGLIRNGDWTFQILVMLEIVPQSGEVYTCQVEHPSLTSPVTVEWRAQSDSAQSKMLSGIGGFVLGLLFLAVGLFIYFRNQKGHSGLQP---------------------------------------------------TGLLS-----------------------------------------------------------
>Ecte-DRB_LOC101655577_tr2 Echinops telfairi isolate 266 unplaced genomic scaffold, EchTel2.0 scaffold00047, whole genome shotgun sequence
MVS--------LAALIPILMVLSPPLALCRDTQPHFLEMNIFECHFTNGTERVRLVHRDIYNGVEDVRFDSDVGEYRAVTELGRPDAEYWNSQKEFIERKRAEVDTVCRHNYGVFDGFSVQRRVEPVVSVYPAKTQPLQHHNLLVCSVNGFYPGHIEVRWFRNGKEEKAGVVSTGLIQNGDWTFQMLVMLEVIPQSGEVYSCQVEHPSLTSPVTVEWRAQSESAQSKMLSGIGGFVLGLLFLGAGLFIHFRNQKGHSGLQP---------------------------------------------------TGLLS-----------------------------------------------------------
>Eled-DRB_LOC102852968_tr3 Elephantulus edwardii isolate Elephantulus edwardi_28Jun2011 unplaced genomic scaffold, EleEdw1.0 scaffold00017, whole genome shotgun sequence
MVNLWFPGSTGMAALTLMVMVLSPPLALSRNTE-------------------------------------------------------------------RAEVETYCKHNYEVSENFLVRRRAEPKVTVYPSKTEPLQHHNLLVCSVSGFYPGHIEVKWFRNGQEEEAGVVSTGLVRNGDWTFQMLVMLETIPQSGEVYSCQVEHPSLESPVTVEWRAQSGSAQSKMLSGIGGFVLGVLFLGAGLFIHFRNQKGHSGLQP---------------------------------------------------T---------------------------------------------------------------
>Eled-DRB_LOC102853800_tr3 Elephantulus edwardii isolate Elephantulus edwardi_28Jun2011 unplaced genomic scaffold, EleEdw1.0 scaffold00017, whole genome shotgun sequence
MVSLWFPGGTWMAALTLMMVVLSLPLALSRNTQPHFLEQLKAECHFTNGTERVRLLERYIYNREEDVRYDSDVGEYRAVTELGRADAKLWNSQKELLEDRRAAVER-CKHNYGVLDNFLVQRRVEPKVTVYPSKTEPLQHHNLLVCSVSGFYPGHIEVKWFRNGQEEEAGVVSTGLVRNGDWTFQMLVMLEAVPQSGEVYSCQVEHPSLESPVTVEWRAQSGSAQSKMLSGIGGFVLGVLFLGAGLFIHFRNQKGHSGVQP---------------------------------------------------T---------------------------------------------------------------
>Eled-DRB_LOC102854204_tr3 Elephantulus edwardii isolate Elephantulus edwardi_28Jun2011 unplaced genomic scaffold, EleEdw1.0 scaffold00017, whole genome shotgun sequence
MVSLWFPGGTWMAALTLMMVVLSPPLALSRNTQPHFLVQGKAECHFTNGTERVQFVARYIYNRAEVVRFYSDVGEFRAVKELGRSIAKDWNSRKDFMEQTRAAVETFCKHNYGIFDKFLALQRAEPKLIVYPSKTEPLQHHNLLVCSVSGFYPGHIEVKWFRNGQEEEAGVVSTGLVRNGDWTFQMLVMLEAVPQSGEVYSCQVEHPSLESPVTVEWRAQSGSAQSKMLSGIGGFVLGVLFLGAGLFIHFRNQKGHTGLQP---------------------------------------------------T---------------------------------------------------------------
>Eled-DRB_LOC102854615_tr3 Elephantulus edwardii isolate Elephantulus edwardi_28Jun2011 unplaced genomic scaffold, EleEdw1.0 scaffold00017, whole genome shotgun sequence
MVSLWFPGDTWMAALTLMMVLLSPLLALSRNTQP---------------------------------RFDSDVGEYRAVTELGRPDAEYWNSQKDLLELRRAEVETYCKHNYGVFDNFLVRRRTEPKVTVYPSKTEPLQHHNLLVCSVSGFYPGHIEVKWFRNSQEEEAGVVSTGLVRNGDWTFQMLLMLEAVPQSGEVYSCQVEHLSLESPVTVEWRAQSRSAQSKMLSGIGGFLLGLLFLGAGLFIHFRNQK--------------------------------------------------------------------------------------------------------------------------
>Eqca-DRB_100052006_nt Equus caballus isolate Twilight breed thoroughbred chromosome 20, EquCab3.0, whole genome shotgun sequence
MVCLWFPGGSWMAALTAILMVLSPPLAWAKNTRPHFLEAVKFECRFSNGTERVRFLERRFHNGEEYARFDSDVGEYRAVTELGRPDAEYWNGQQDILDERRAAVDTYCRHNYGVIDGFLVRRRVEPTVTVYPAKTQPLQHHNLLVCSVNGFYPGHIEVRWFRNGQEEEAGVVSTGLIRNGDWTFQTMVMLETVPQSGEVYTCQVEHPSLTSPVTVEWRAQSESAQSKMLSGVGGFVLGLLFLGAGLFIHCRNQKGHTGLQP---------------------------------------------------TGLLN-----------------------------------------------------------
>Eqca-DRB_100052310_nt2 Equus caballus isolate Twilight breed thoroughbred chromosome 20, EquCab3.0, whole genome shotgun sequence
MVCLWFPRGSWMAALTVILMVLNPPLAWARDTQPHFLELVKHECHFSNGTQRVRFLDRYFYNREEYVRFDSDVGEYRAVTELGRPDAEYWNGQKDVLDDARAAVDTYCRHNYGVSDSFLVPRRVAPTVTVYPAKTQPLQHHNLLVCSVNGFYPGHIEVRWLRNGQEEEAGVISTGLIRNGDWTFQTLVMLETVPQSGEVYTCQVEHPSLTNPVTVEWRAHSESAQSKMLSGVGGFVLGLLFLGAGLFIHRRNQKGHAGLQP---------------------------------------------------TGLLS-----------------------------------------------------------
>Eqca-DRB_100052364_nt2 Equus caballus isolate Twilight breed thoroughbred chromosome 20, EquCab3.0, whole genome shotgun sequence
MLCLWFPGGSWMAALTVMLMVLNPPLGWARNTQPHFLEYSTSECHFFNGTERVRYLDRYFYNGKEYVRFDSDVGEYRALTELGRRSAEYWNGQQDILEQKRAKVDTYCRHNYAVSESFLVQRRVEPTVTVYPAKTQPRQHHNLLVCSVNGFYPGHIEVRWLRNGQEEEAGVISTGLIRNGDWTFQTLVMLETVPQSGEVYTCQVEHPSQTSPVTVEWRAPSESAQSKMLSGVGGFVLGLLFLGAGLFIHRRNQKGHGGLQP---------------------------------------------------TGLLS-----------------------------------------------------------
>H2-Eb1_14969_nt H2-Eb1: histocompatibility 2, class II antigen E beta
M--VWLPRVPCVAAVILLLTVLSPPVALVRDSRPWFLEYCKSECHFYNGTQRVRLLERYFYNLEENLRFDSDVGEFRAVTELGRPDAENWNSQPEFLEQKRAEVDTVCRHNYEISDKFLVRRRVEPTVTVYPTKTQPLEHHNLLVCSVSDFYPGNIEVRWFRNGKEEKTGIVSTGLVRNGDWTFQTLVMLETVPQSGEVYTCQVEHPSLTDPVTVEWKAQSTSAQNKMLSGVGGFVLGLLFLGAGLFIYFRNQKGQSGLQP---------------------------------------------------TGLLS-----------------------------------------------------------
>H2-Eb2_381091_nt H2-Eb2: histocompatibility 2, class II antigen E beta2
MVSLWLPRGLCVAAVILSLMMLTPPVILVRDPRPRFLEQLKAECHYFNGKERVWSVTRFIYNQEEFARFNSDFGKFLAVTELGRPIVEYLNTQKDMLDNYRASVDR-CRNNYDLVDIFMLNLKAEPKVTVYPAKTQPLEHHNLLVCSVIDFYPGSIEVRWFRNGEEEKTGVVSTGLIQNRDWTYQTLVMLEMVPRGGEVYTCQVEHPSLTSPVTVEWRARSTSAQNKLLSGVMGMALGLFILAVGLFFYLRNLRGSVSHGA-----------------------------------------GEGAESF---TSRLT------------------GSGSECHM-------------GPGLSI--------------
>HLA-DRB1_3123_nt HLA-DRB1: major histocompatibility complex, class II, DR beta 1
MVCLKLPGGSCMTALTVTLMVLSSPLALSGDTRPRFLWQPKRECHFFNGTERVRFLDRYFYNQEESVRFDSDVGEFRAVTELGRPDAEYWNSQKDILEQARAAVDTYCRHNYGVVESFTVQRRVQPKVTVYPSKTQPLQHHNLLVCSVSGFYPGSIEVRWFLNGQEEKAGMVSTGLIQNGDWTFQTLVMLETVPRSGEVYTCQVEHPSVTSPLTVEWRARSESAQSKMLSGVGGFVLGLLFLGAGLFIYFRNQKGHSGLQP---------------------------------------------------TGFLS-----------------------------------------------------------
>HLA-DRB3_3125_nt HLA-DRB3: major histocompatibility complex, class II, DR beta 3
MVCLKLPGGSSLAALTVTLMVLSSRLAFAGDTRPRFLELLKSECHFFNGTERVRFLERHFHNQEEYARFDSDVGEYRAVRELGRPDAEYWNSQKDLLEQKRGQVDNYCRHNYGVGESFTVQRRVHPQVTVYPAKTQPLQHHNLLVCSVSGFYPGSIEVRWFRNGQEEKAGVVSTGLIQNGDWTFQTLVMLETVPRSGEVYTCQVEHPSVTSPLTVEWSARSESAQSKMLSGVGGFVLGLLFLGAGLFIYFRNQKGHSGLQP---------------------------------------------------TGFLS-----------------------------------------------------------
>HLA-DRB5_3127_nt HLA-DRB5: major histocompatibility complex, class II, DR beta 5
MVCLKLPGGSYMAKLTVTLMVLSSPLALAGDTRPRFLQQDKYECHFFNGTERVRFLHRDIYNQEEDLRFDSDVGEYRAVTELGRPDAEYWNSQKDFLEDRRAAVDTYCRHNYGVGESFTVQRRVEPKVTVYPARTQTLQHHNLLVCSVNGFYPGSIEVRWFRNSQEEKAGVVSTGLIQNGDWTFQTLVMLETVPRSGEVYTCQVEHPSVTSPLTVEWRAQSESAQSKMLSGVGGFVLGLLFLGAGLFIYFKNQKGHSGLHP---------------------------------------------------TGLVS-----------------------------------------------------------
>Laob-DRB_LOC113631214_IIa LOC113631214: DLA class II histocompatibility antigen, DR-1 beta chain-like
MVSLYFSGGSWMAALTVILMVLSPPLAWARETPSLFMNQFKAECRFSNGTERVRFVVRCTYNREELVRFDSDVGEFRAVTELGRPDAEYWNSQKDLLERHRAGVDTYCRHNYRVGESFTVQRRVAPTVTVYPAKTQPLQHHNLLVCSVNGFYPGHVEVRWFRNGQEEEAGVVSTGLIANGDWTFQTMVMLETVPQSGEVYTCHVEHPSRTSPVTVEWRAQSESAQSKMLSGIGAFVLGLLFLGVGLFIYFRNQKGHSGLQP---------------------------------------------------TGLLN-----------------------------------------------------------
>Lewe-DRB_LOC102741082_nt LOC102741082: DLA class II histocompatibility antigen, DR-1 beta chain-like
MVCLCFLGGSWMTALTLILIVLSPPLAWARDTPPHFMQQYKFECHYSNGTERVRFLARLIYNREEFVRFDSDVGEYRPVTELGRPDAEYWNRQKDIVEEARAAVDTVCRHNYRVGESFTVQRRVEPTVTVYPTKTQPLQHHNLLVCSVNGFYPGHIEVRWFRNGQEEEAGVVSTGLIQNGDWTFQTLVMLETVPQSGEVYTCQVEHPSLMSLVTVEWRAQSESAQSKMLSGIGGFVLGLLFLVVGLFIYFRNQKGHSGLQP---------------------------------------------------TGLLS-----------------------------------------------------------
>Lewe-DRB_LOC102748173_nt2 LOC102748173: DLA class II histocompatibility antigen, DR-1 beta chain-like
MACLWFPRGLSVAALMVILMMLGSPLAWARDTP------------------------------------------------------------------------------------------LEPTVTVYPTKTQPLQHHNLLVCSVNGFYPGHIEVRWFRNGQEEEAGVVSTGLIRNGDWTFQTLVMLETVPQSGEVYTCQVEHPSLTSPVTVEWRAQSDSAQSKMLSGIGGFVLGLLFLLVGLFIYFRNQKGHS-FQP---------------------------------------------------TGLLS-----------------------------------------------------------
>Live-DRB_LOC103087297_IIa LOC103087297: HLA class II histocompatibility antigen, DRB1-4 beta chain-like
MVSLYFSGGSWMAALTVILMVLSPPLVWARETRSLFMYQFKGECHFSNGTERVRLVVRHIYNREEYVRFDSDVGEYRAVTELGRPDAEYWNGQKDLLEQRRAEVDTVCRHNYGVGESFTVQRRVAPTVTVYPAKTQPLQHHNLLVCSVNGFYPGHIEVRWFRNGREEEAVVVSTGLIPNGDWTFQTMVMLETVPQSGEVYTCHVEHPSRTSPVTVEWRAQSESAQSKMLSGIGAFVLGLLFLGVGLFIYFRNQKGHSGLQP---------------------------------------------------TGLLN-----------------------------------------------------------
>Loaf-DRB_LOC100659676_tr2 LOC100659676: HLA class II histocompatibility antigen, DRB1-4 beta chain-like
MVCLWFPRGTWMAALTLILMVLSPPLALSRDTR-----------YFTNGTERVRFVQRYIYNREEYVRFDSDVGEFVVVTELGRPDAEYWNGQKELLDDRRGEVDRFCRHNYGVFESFSVQRRVEPMVTVYLAKTQPLQHHNLLVCSVNGFYPGNIEVRWFRNGQEEEAGVVSTGLIQNGDWTFQILVMLETIPQSGEVYTCQVEHPSLTSPVTVEWRAQSGSAQSKMLSGIGGLVLGLLFLGAGLFIHFRNQKARSGLQP---------------------------------------------------TGFLS-----------------------------------------------------------
>Loaf-DRB_LOC100665293_na LOC100665293: HLA class II histocompatibility antigen, DRB1-4 beta chain-like
MVCLWFPRGTWMAALTLILMMLSPPLALSRDTRPRFQWHGKSECHFTNGTERVRFVERYIYNREEYARFDSDVGEYRAVTELGRPSAEYWNGQKELLDEKRGQVDNYCRHNYGVGESFTVQRRVEPAVTVYLAKTQPLQHHNLLVCSVNGFYPGHIEVRWFRNGQEEEAGVVSTGLIQNGDWTFQILMMLETIPQSGEVYTCQVEHPSLMSPVTVEWRAQSGSAQSKMLSGIGGLVLGLLFLGAGLFIHFRNQKAPSGLQP---------------------------------------------------TGLLS-----------------------------------------------------------
>Loaf-DRB_LOC100665860_na Loxodonta africana isolate ISIS603380 unplaced genomic scaffold, Loxafr3.0 scaffold_332, whole genome shotgun sequence
MVCLRFPRGTWMAALTLILMMLSPPLALSRDT------------------------------------------------------------------------------------------RLEPVVTVYTAKTQPLQHHSLLVCSVNGFYPGYIEVSWFRNGQEEEAGVVSTGLIQNGDWTFQILVMLETIPQSGEVYSCQVEHPSLMSPLTVEWRAQSGSAQSKMLSGIGGLVLGLLFLGAGLFIHFRNQKARSGLQP---------------------------------------------------TGLLS-----------------------------------------------------------
>Loaf-DRB_LOC100666432_na Loxodonta africana isolate ISIS603380 unplaced genomic scaffold, Loxafr3.0 scaffold_332, whole genome shotgun sequence
----------------------------------------------------------------------------------------------------------------------------EPVVTVYLAKTQPLQHHNLLVCSVNGFYPGHIEVRWFRNGQEEEAGVVSTGLIQNGDWTFRILVMLETIPQSGEVYSCQVEHPSLTSPVTVEWRAQSGSAQSKVLSGIGGLVLGLLFLGAGLFIHFRNQKARSGLQP---------------------------------------------------TGFLS-----------------------------------------------------------
>Loaf-DRB_LOC100675728_na Loxodonta africana isolate ISIS603380 unplaced genomic scaffold, Loxafr3.0 scaffold_284, whole genome shotgun sequence
MVCLWFPRGTWMAALTLILMMLS-PLALSRDTR------------------------------------------------------------------------------------------------XYLAKTQPLQHHSLLVCSVNGFYPGHIEVKWFQNGQEEEAGVVSTGLIQNGDWTFQILVMLETIPQSGEVYSCQVDHPSLTSPVTVEWRAQSGSAQSKVLSGIGGLVLGLLFLGAGLFIHFRNQKARSGPQP---------------------------------------------------TGLLS-----------------------------------------------------------
>Loaf-DRB_LOC104847006_tr2 Loxodonta africana isolate ISIS603380 unplaced genomic scaffold, Loxafr3.0 scaffold_105, whole genome shotgun sequence
----------------------------------------------------------------------------------------------------------------------------EPVVTVYTEKTQPLQHHNLLVCSVNGFYPGHIEVRWFRNGQEEEARVVSTGLIQNGDWTFQILVMLETIPQSGEVYSCQVEHPSLKSPVTVEWRAQSGSAQSKMLSGIGGLVLGLLFLGAGLFTHFRNQKARSGLQP---------------------------------------------------TGLLS-----------------------------------------------------------
>Neas-DRB_LOC112406848_IIa LOC112406848: DLA class II histocompatibility antigen, DR-1 beta chain-like
MVSLYFSGGSWMAALTVILMVLSPPLAWARETHPLFMYQFKSYCYFTNGTERVRYMTRHIYNREEYVRFDSDVGEYRTVTELGRRTAEYWNSQKDLLEQKQAKADTYCRHNYGAVECFTVQRRVAPTVTVYPAKTQPLQHHNLLVCSVNGFYPGHIEVRWFRNGQEEEAGVVSTGLIRNGDWTFQTMVMLETVPQSGEVYTCHVEHPSRTSPVTVEWRARSESAQSKMLSGIGAFVLGLLFLGVGLFIYFRNQKGHSGLQP---------------------------------------------------TGLLN-----------------------------------------------------------
>Nesc-DRB_LOC110586717_nt Neomonachus schauinslandi unplaced genomic scaffold, ASM220157v1 Super-Scaffold_47, whole genome shotgun sequence
MVCLCFLGGSWMTALTLILIVLSPPLAWARDT-------------------------------------------------------------------------------------------------------------------------------------------------------------------------------PLTSPVTVEWRAQSESAQSKMLSGIGGFVLGLLFLVVGLFIYFRNQKGHSGLQP---------------------------------------------------TGLLS-----------------------------------------------------------
>Odro-DRB_LOC101370728_nt2 Odobenus rosmarus divergens isolate Ivan unplaced genomic scaffold, Oros_1.0 Scaffold346, whole genome shotgun sequence
MACLWFPRGLSMAALMVILMMLSSPLAWARDTPPHFLMLCKSECHYSNGTERVRFLDRYFYNREEFVRFDSDVGEYRPVTELGRPNADYWNSQKDIMEQTRAEVDTDCRHNYGVGESFTVQRRVEPTVTVYPTKTQPLQHHNLLVCSVNGFYPGHIEVRWFRNGQEEEAGVVSTGLIRNGDWTFQTLVMLEIVPQSGEVYTCQVEHPSLMSPVTVEWRAQSDSAQSKMLSGIGGFVLGLLFLVVGLFIYFRNQKGHSGLQP---------------------------------------------------TGLLS-----------------------------------------------------------
>Odro-DRB_LOC101379947_nt Odobenus rosmarus divergens isolate Ivan unplaced genomic scaffold, Oros_1.0 Scaffold494, whole genome shotgun sequence
----------------------------------HFLILGKAECHYSNGTERVRFLDRYFYNREEFVRFDSDVGEYRPVTELGRPNADYWNSQKDIMEQTRAEVDTDCRHNYGVGESFTVQRRVEPTVTVYPTKTQPLQHHNLLVCSVNGFYPGHIEVRWFRNGQEEEAGVVSTGLIQNGDWTFQTLVMLEIVPQSGEVYTCQVEHPSLTSPVTVEWRAQSESAQSKMLSGIGGFVLGLLFLVVGLVIYFRNQKGHSGLQP---------------------------------------------------TGLLS-----------------------------------------------------------
>Oraf-DRB_LOC103195747_tr2 Orycteropus afer afer isolate SDZICR_OR568_19922 unplaced genomic scaffold, OryAfe1.0 scaffold00059, whole genome shotgun sequence
-----------MAALTLTLMVLSPPLVLSRNTQTHFLRQNKAECHFTNGTERVQYVERYVYNREEYVRFDSDVGVYVAVTKLGPLSAEYLNSQKELLENRRAAVDTYCKHNYGAIQSFLVQRRVEPVVIVYPAKTQPLQHHNLLVCSVNGFYPGPIEVRWLRNGQEEEAGVVSTGLIQNGDWTFQILVMLEAIPQRGDVYSCQVEHPSLKSPVTVEWRTQSNSAQIKMLSGIGAFVLGLLFLGVGLFIYIRNQKGHSGLQP---------------------------------------------------TGLLS-----------------------------------------------------------
>Oror-DRB_LOC101276823_IIa LOC101276823: HLA class II histocompatibility antigen, DRB1-9 beta chain-like
MVSLYFSGGSWMAALTVILMVLSPPLAWARETPSLFMYQFKFECHFSNGTERVRLLARHIYNREECVRYDSDVGEYRAVTELGRRTAEKWNSQKDLLERRRAEVDTVCRHNYGVGESFTVQRRVAPTVTVYPAKTQPLQHHNLLVCSVNGFYPGHIEVRWFRNGQEEEAGVVSTGLIPNGDWTFQTMVMLETVPQSGEVYTCHVEHPSQTSPVTVEWRAQSESAQSKMLSGIGAFVLGLLFLGVGLFIYFRNQKGHSGLQP---------------------------------------------------TGLLN-----------------------------------------------------------
>Oror-DRB_LOC101278787_IIa Orcinus orca isolate Morgan unplaced genomic scaffold, Oorc_1.1 Scaffold258, whole genome shotgun sequence
----------------------------------NFLLQFKSYCYFTNGTERVRYMTRHIYNREEYVRFDSDVGEYRTVTELGRRTAEYWNSQKDLLEQKQAKADTYCRHNYGAVECFTVQRRVAPTVTVYPAKTQPLQHHNLLVCSVNGFYPGHIEVRWFRNGQEEEAGVVSTGLIANGDWTFQTMVMLETVSQSGEVYTCHVEHPSRTSPVTVEWRAQSECAQSKMLSGTGGFVLGLLFLGVGLFIYFRNQK--------------------------------------------------------------------------------------------------------------------------
>Phca-DRB_LOC102973764_IIa LOC102973764: DLA class II histocompatibility antigen, DR-1 beta chain-like
MVSLYFSGGSWMAALTVILMVLSPPLAWTKETQQNFLYQFKPYCYFTNGTERVRFVTRDIYNREEHVRFDSDVGEYRAVTELGRPDAEYWNSQKDILERTRAAVDTYCRHNYGVVESFTVQRRVAPTVTVYPAKTQPLQHHNLLVCSVNGFYPGHIEVRWFRNGQEEEAGVVSTGLIPNGDWTFQTMVMLETVPQSGEVYTCHVEHPSWTSPVTVEWRAQSESAQSKMLSGIGAFVLGLLFLGVGLFVYFRNQKGHSGLQP---------------------------------------------------TGLLN-----------------------------------------------------------
>Phca-DRB_LOC102978546_IIa Physeter catodon isolate SW-GA unplaced genomic scaffold, ASM283717v1 scaffold32, whole genome shotgun sequence
MVSLYFSGGSWMAALTVILMVLSPPLAWTKETQ-------------------------------------------------------------------RAAVDTYCRHNYGVVESFTVQRRVAPTVTVYPAKTQPLQHHNLLVCSVNGFYPGHIEVRWFRNGQEEEAGVVSTGLIPNGDWTFQTMVMLETVPQSGEVYTCHVEHPSWTSPVTVEWRAQSESAQSKKMSGIGGFVLGLLFLGVGLFIYFRNQKGHSGLQP---------------------------------------------------TGLLS-----------------------------------------------------------
>Ptal-DRB_LOC102884055_nt Pteropus alecto unplaced genomic scaffold, ASM32557v1 scaffold202, whole genome shotgun sequence
MVCLLFPGGSWMAALTVILMVLSPPLAWARDTSPHFLYLWKSDCQFFNGTERVWFLERHFYNREEFVRFDSDVGLYRAVTEVGRSWAEYWNSQADILERKRALVDTYCRHNYGVVESFTVQRRVEPTVTVYPAKTQRLQHHNLLVCSVNGFYPGDIEVIWLRNGQQEEAGVISTGLIHNGDWTFQTLVMLETVPQSGEVYTCQVQHASRASPISMEWRAQSESAQSKMLSGIGGFVLGLLFLGVG-----------------------------------------------------------------------------------------------------------------------------------
>Trma-DRB_LOC101343225_tr2 Trichechus manatus latirostris isolate Lorelei unplaced genomic scaffold, TriManLat1.0 scaffold00261, whole genome shotgun sequence
----------------------------------------------------------------------------------------------------------------------------EPVVTVYPAKTQPLQHHSLLVCSVNGFYPGHIEVRWF----------------QNGDWTFHILVMLETIPQSGKIYSCQVEHPSLTSPVTVEWRAQSESAQSKMLSGIQGLALGLLFLGAGLLIHFRNQK--------------------------------------------------------------------------------------------------------------------------
>Tutr-DRB_LOC101336370_IIa Tursiops truncatus isolate MMES2002162SC unplaced genomic scaffold, NIST Tur_tru v1, whole genome shotgun sequence
MVSLYFSGGSWMAALTVILMVLSPPLAWTRETPSLFMYQVKGECHFSNGTERVRALVRDIYNQEEHVRYDSDVGEYRAVTELGRPDAEYWNSQKDLLERRRAEVDTVCRHNYR--------------------------------------------------------------------------------------------------------GAQSESAQSKMLSGIGAFVLGLLFLGVGLFIYFRNQKGHSGLQP---------------------------------------------------TGLLN-----------------------------------------------------------
>Tutr-DRB_newlocus1_IIa Tursiops truncatus isolate MMES2002162SC unplaced genomic scaffold, NIST Tur_tru v1, whole genome shotgun sequence
----------------------------------------------------------------------------------------------------------------------------APTVTVYPAKTQPLQHHNLLVCSVNGFYPGHVEVRWFWNGQ--EAGVVSTGLIPNGDWTFQTMVMLETVPQSGEVYTCHVEHPSRTSPVIVEWRAQSECAQSKMLSGTGGFVLGLLFLGVGLFIYFRNQKEHPALQP---------------------------------------------------TDHLR-----------------------------------------------------------
