# Supplementary material for: The Marine Mammal Class II Major Histocompatibility Complex Organization
Source: Front Immunol. 2019 Apr 4;10:696. doi: 10.3389/fimmu.2019.00696 (PMC6459222; doi:10.3389/fimmu.2019.00696)
Supplement: Supplementary file 11 [file Data_Sheet_9.FASTA]

>BoLA-DQB_282495_nt Bos taurus isolate L1 Dominette 01449 registration number 42190680 breed Hereford chromosome 23, ARS-UCD1.2, whole genome shotgun sequence
-MSGMVALWIPRGLWTAA--VMVTLAVLSTPGAEGRDSPQDTVVHFMCQCYFTNGTERVRYVTRYIYNQEETAYYDSDVGEYRAVTQLGRTLAEYWNSQKDILEQTRAELDTVCRHNYQL-EVITSLQRQVEPTVTISLSRTEALNHHNLLVCSVTDFYPGQIKVRWFQNGKEETAGIVSTPLIRNGDWTFQILVMLEMTPKRGDVYTCRVEHPSLQSPISVEWRAQSESAQSKMLSGVGGFVLGLIFLGLGLIVRRRSQKG--------LMH---
>BoLA-DQB_539241_nt BLA-DQB: MHC class II antigen
-MSGMVALRIPRGLWTAV--VMVTLVMLSTPGAEGRDSPKDFVLQFKGLCYFTNGTERVRYVTRYIYNQEEYVRFDSDWDEYRALTPLGRPAAEYWNSQKDILEQTRAEADTVCRHNYQA-ELITSLQRRVEPTVTISPSRTEALNHHNLLVCSVTDFYPSQIKVRWFRNDREETAGVVSTPLIRNGDWTFQILVMLEMTPQRGDVYTCRVEHPSLQSPIMVEWRAQSESAQSKMLSGVGGFVLGLIFLGLGLIIHHRSQKG--------LMR---
>Caur-DQB_LOC112816047_nt Callorhinus ursinus isolate GAN/ISIS: 27379988/994484 unplaced genomic scaffold, ASM326570v1 scaffold654, whole genome shotgun sequence
MMPGKMALRIPRGLWTAA--EMMILVVLSIPVAEGRDSPQDFVYQFKGECYFTNGTERVRLLTRHIYNREEYVRFDSDVGEHRPVTEWGRPDAEYWNRQKDFMEQTRAAVDTVCRHNYGN-EERTTLQRRVEPTVTISPSRTEVLNHHNLLVCSVTDFYPGQIKVRWFRNDQEERTGVVSTPLIRNGDWTFQILVMLEITPQRGDVYTCHVEHPSLQSPITVEWRAQSESAQSKMLSGIGGFVLGLIFLGLGLIIRHRSQKGPRGSLPAGLLH---
>Dano-DQB_LOC101435064_nt Dasypus novemcinctus isolate 3-136 unplaced genomic scaffold, Dasnov3.0 Scaffold24295, whole genome shotgun sequence
----------------------------------------DFVFQFKGMCYFTNGTERVRLVTRYVYNREEYARYDSDVGEYVAVTEHGRWTAKHWNSQKDVLEGTRAAVDTVCRHNYRN-EESTNLQRRVEPTVTISPSKTEALNHHNLLVCSVTDFYPGQVKVQWFRNDQEETAGVVSTPVIRNGDWTYQILVMLEMTPQRGDVYTCRVEHPSLQSPLTVQWRPQSESAQSKLLSGVGGFVLGLIFLGLGLFVHRRSQKGSRGPPPTGLLH---
>Dele-DQB_LOC111178925_IIa Delphinapterus leucas isolate GAN/ISIS: 26980492/103006 unplaced genomic scaffold, ASM228892v2 scaffoldscaf27, whole genome shotgun sequence
-MSGTVALQIPRGLWTTA--VMVMLTVLSTPEAEGRDSPQDFLYRHMGLCYFTNGTERVRLVSRYIYNREELVHFDSDVGEYRAVTELGRPDAEYWNSQKDILERTRAELDTVCRHNYRV-HKTFTVQRRVEPTVTISPSRTEALNHHNLLVCSVTDFYPGQIKVRWFRNDQEETAGVVSTPLIRNGDWTFQMLVMLEMTPQPGDVYTCHVEHPSLQSPIMVEWWAQSGSAQSKMLSGVGGFVLGLIFLGLGLVIRHRSQKGPPGPPPAGH-----
>DLA-DQB_474862_nt Canis lupus familiaris breed boxer chromosome 12, CanFam3.1, whole genome shotgun sequence
----------------------------------------------------------------------------------------------------------------------------------VEPTVTISPSRTEVLNHHNLLVCSVTDFYPGQIKVRWFRNDQEQTAGVVSTPLIRNGDWTFQILVMLEMTPQRGDVYTCHVEHASLQSPITVQWRPQSESAQSKMLSGIGGFVLGLIFLGLGLIIRHRSQKGSRGSPPAGLLH---
>DLA-DQB_LOC100856137_nt Canis lupus familiaris breed boxer chromosome 12, CanFam3.1, whole genome shotgun sequence
-MSGKMTLCIPRGFWTAA--VMMILVVLSIPVAEGRDSPQDFVYQCKAECYFTNGTERVRFLAKYIYNREEFVRFDSDVGEFRAVTELGRPSAEYWNGQKEILEQERATVDTVCRHNYGV-EELYTLQRRVEPTVTISPSRTEVLNHHNLLVCSVTDFYPGQIKVRWFRNDQEQTAGVVSTPLIRNGDWTFQILVMLEMTPQRGDVYTCHVEHASLQSPITVQWRAQSESAQSKMLSGIGGFVLGLIFLGLGLIIRHRSQKGSRGSPPAGLLH---
>Eled-DQB_LOC102871546_nt Elephantulus edwardii isolate Elephantulus edwardi_28Jun2011 unplaced genomic scaffold, EleEdw1.0 scaffold00017, whole genome shotgun sequence
-MSEKMALQIPRGLWNTA--VMVMLMVLSTPKIEGRDTPKDFVFQFKGLCYFTNGTEQVRSVTRYVYNREEYVRFDSDVDEYRAVTPLGRPDAEYYNSQKDILEQTRAEIETVCKHNYQN-EILTTLQRRVEPMVTVYLAKTEALNHHNLLICLVTDFYPSQIKVQWFRNDQEESAGVVSTPIIRNGDWTYQIHVMLEITPQRGDVYTCQVEHISLQSPITVEWRVQPESAQSKMLSGIGGFMLGLIFLGLGFIIHRRSQKGPAGPPSTGLLH---
>Eqca-DQB_100052184_nt Equus caballus isolate Twilight breed thoroughbred chromosome 20, EquCab3.0, whole genome shotgun sequence
-----MAPQIPRGLWTAA--VMVMLVVLSTPVAEGRDSPQDFVVQFMGQCYFTNGTEHVRYVTRYIYNREEYVRFDSDVGEYRALTELGRPEAEYWNGQKDILEGTRAELDRVCRPNYQL--EFPALERRVEPRVTISPSRTEALNHHNLLVCSVTDFYPGQIKVRWFRNGQEETAGVVSTPLIRNGDWTFQILVMLEMTPQRGDVYTCHVEHPSLQSPITVEWQAQSESAQSKMLSGVGGFMLGLIFLGLGLIIHHRSQKGPRGPPPAGLLR---
>Eqca-DQB_100060320_nt Equus caballus isolate Twilight breed thoroughbred chromosome 20, EquCab3.0, whole genome shotgun sequence
-----MAPQMPRGLWTAA--VMVTLVVLSIPVAEGRDSPKDFVIQLKGLCYFTNGTERVRLVTRYIYNREEWVRFDSDVGEYRALTEQGRPDAEDWNGQKDFLEQTRAYVDTVCRHNYQV-EAPFTWQRRVKPTVTISPSRTEALNHHNLLVCSVTDFYPGQIKVQWFRNDQEETAGVVSTPLIRNGDWTFQILVMLEMTPQRGDVYTCHVEHPSLQSPITVQWQVQSESAQSKMLSGIGGFVLGLIFLGLGLIIHHRSKKGPRGPSPAGLLD---
>Eqca-DQB_LOC100060531_nt Equus caballus isolate Twilight breed thoroughbred chromosome 20, EquCab3.0, whole genome shotgun sequence
-MSGKMAPQIPRGLWTAA--MMAMLVVLSTPVAEGRDSPQDFVFQLKGQCYFTNGTERVRLVTRLIYNREEFVRFDSDVGEFQAVTELGRHIAEDWNGQKDVLEQKRAELDTVCRHNYQV-EALTTLQRRVEPRVTISPSRTEVLNRHNLLVCSVTDFYPGQIKVRWFRNDQEETAGIVSTPLIRNGDWTFQILVMLEMTPQRGDVYTCHVEHPSPQSPITVQWRTHSESAQNKMLCGIGSFVLGLVFLGLSLIIHHRSQKGPRGSPPADCIREAH
>H2-Ab1_14961_nt Mus musculus strain C57BL/6J chromosome 17, GRCm38.p4 C57BL/6J
-----MALQIPSLLLSAA--VVV-LMVLSSPGTEGGDSERHFVYQFMGECYFTNGTQRIRYVTRYIYNREEYVRYDSDVGEHRAVTELGRPDAEYWNSQPEILERTRAELDTVCRHNYEGPETHTSLRRLEQPNVVISLSRTEALNHHNTLVCSVTDFYPAKIKVRWFRNGQEETVGVSSTQLIRNGDWTFQVLVMLEMTPRRGEVYTCHVEHPSLKSPITVEWRAQSESAWSKMLSGIGGCVLGVIFLGLGLFIRHRSQKGPRGPPPAGLLQ---
>HLA-DQB_3119_nt HLA-DQB1: major histocompatibility complex, class II, DQ beta 1
-MSWKKALRIPGDLRVAT--VTLMLAMLSSLLAEGRDSPEDFVFQFKGMCYFTNGTERVRLVTRYIYNREEYARFDSDVGVYRAVTPQGRPDAEYWNSQKEVLEGTRAELDTVCRHNYEV-AFRGILQRRVEPTVTISPSRTEALNHHNLLVCSVTDFYPGQIKVRWFRNDQEETAGVVSTPLIRNGDWTFQILVMLEMTPQRGDVYTCHVEHPSLQSPITVEWRAQSESAQSKMLSGVGGFVLGLIFLGLGLIIRQRSQKGPQGPPPAGLLH---
>Laob-DQB_newlocus1_IIa Lagenorhynchus obliquidens isolate GAN/ISIS:26980383/991018 unplaced genomic scaffold, ASM367639v1 scaffold31, whole genome shotgun sequence
-MSGTVALQIPRGLWTTA--VMVMLTVLSTPEAEGRDSPQDFLFRHMFMCYFTNGTERVRFVDRYIYNREEFVRFDSDVDDFRAVTELGRRTAEYWNSQEDILEEERAALDTVCRHNYRV-DETFTVQRRVEPTVTISPSRTEALNHHNLLVCSVTDFYPGQIKVRWFRNDQEETAGVVSTPLIRNGDWTFQMLVMLEMTPQQGDVYTCHVEHPSLQSPIMVEWWAQSGSAQSKMLSGVGGFVLGLIFLGLGLIIRHRSQKGPPGPPPAGH-----
>Lewe-DQB_LOC102747485_nt Leptonychotes weddellii isolate WS11-02 unplaced genomic scaffold, LepWed1.0 scaffold00928, whole genome shotgun sequence
-MPGKMALRIPRGLWTAA--EMMILVVLSIPVAEGRDSPQDFVYQFKGECYFTNGTERVRFLSRFIYNREEFVRFDSDVGEFRPVTELGRPAAEYWNRQKDFLERTRAAVDTVCRNNYGF-EERTTLQRRVEPTVTISPSRTEVLNHHNLLVCSVTDFYPGQIKVQWFRNDQEETAGVVSTPLIRNGDWTFQILVMLEMTPQRGDVYTCRVEHPSLQSPITVEWRAQSESAQSKMLSGIGGFVLGLIFLGLGLIIRHRSQKGPRGSPPAGLLH---
>Live-DQB_newlocus1_IIa LOC103087452: DLA class II histocompatibility antigen, DR-1 beta chain-like
-MSGTVALQIPRGLWTTA--VMVMLMVLSTPGAESRDSPQDFMFWHMSLCYFTNGTERVRFVERYIYNREEFTRFDSDVGEYRAVTELGRRTAEYWNSQKDLLEQKRAVVDTVCRHNYGV-GESFTVQRRVEPTVTISPSRTEALNHHNLLVCSVTDFYPGQIKVRWFRNDQEETAGVVSTPLIRNGDWTFQMLVMLEMTPQQGDVYTCHVEHPSLQSPIMVEWWAQSGSAQSKMLSGVGGFVLGLIFLGLGLIIRHRSQK---------------
>Loaf-DQB_LOC100673824_nt Loxodonta africana isolate ISIS603380 unplaced genomic scaffold, Loxafr3.0 scaffold_105, whole genome shotgun sequence
-MCEKMALHTPRDLWTAA--VMVML-MLSTPMTEGSDSP-------------------------------------------------------------------------------------------LAPEVTISPARTETINHHNLLVCTVTDFYPGQVKVRWFRNDQEETAGVVSTPLIRNGDWTFQILVMLEMTPQREDVYTCHVEHPSLQSPIVVEWRAQSESAQSKMLSGVGGFVLGLAFLGLGLIIHHRNQKGPRGPPPTGLLH---
>Loaf-DQB_LOC100674104_nt Loxodonta africana isolate ISIS603380 unplaced genomic scaffold, Loxafr3.0 scaffold_105, whole genome shotgun sequence
-MCEKMALHTPRGLWTAA--AMIVL-MLSTPMTEGRDSP-------------------------------------------------------------------------------------------VAPEVTISPARTETVNHHNLLVCTVTDFYPGQVKVRWFRNDQEETAGVVSTPLIRNGDWTFQILVMLEMTPQRGDVYTCHVEHPSLQSPIVVEWRAQSESAQSKMLSGVGGFVLGLVFLGLGLIIHHRSQKGLRESPPTGLLR---
>Loaf-DQBp_LOC100668794_na LOC100668794: HLA class II histocompatibility antigen, DQ beta 2 chain-like
-MCEKMALQIPRGFWTAV--VMVTLMLLSIQKAESRDSPKDFVVQDKFLCYFTNGTEQVWLVERSIYNREEILRFDSDLGKFLALTPLGLQASEYWNSQKDVLEERRAYVDTLCRTNYQG-DESFTVQRRLEPHVTISPAKTEILNHHNLLICSVTDFYPGHVKVRWFRNDQEETAGIVSTPLIRNGDWTFQILVMLEVTLQHGDVYICQVEHPSLQSPIVVEWRTQSESAQSKILTGIRGFVLGLTFLGLGLTIHHRNQKG--------LLH---
>Neas-DQB_LOC112406849_IIa Neophocaena asiaeorientalis asiaeorientalis breed wild unplaced genomic scaffold, Neophocaena_asiaeorientalis_V1 scaffold962, whole genome shotgun sequence
-MSGTVALQIPRGLWTTA--VMVMLTVLSTPEAEGRDSPQDFLFRHMGLCYFTNGTERVRFVERYIYNREEFVRFDSDVGEYRAVTELGRPDAKYWNGQKDILEQNRAELDTVCRHNYRI-YKTFTVQRRVEPTVTISPSRTEALNHHNLLVCSVTDFYPGQIKVRWFRNDQEETAGVVSTPLIRNGDWTFQMLVMLEMTPQPGDVYTCHVEHPSLQSPIMVEWWAQSGSAQSKMLSGVGGFVLGLIFLGLGLIIRHRSQKGPRGPPPAGH-----
>Nesc-DQB_LOC110575559_nt Neomonachus schauinslandi unplaced genomic scaffold, ASM220157v1 Super-Scaffold_152, whole genome shotgun sequence
-MPGKIALRIPRGLWTAA--EMMMLVVLSIPVAEGRDSPQDFVYQFKGECYFTNGTERVRLLTRHIYNREEFVRFDSDVGEYRPVTELGRPDAQYWNSQKDILERTRAEVDTVCRNNYGN-EERTTLQRRVEPTVTISPSRTEVLNHHNLLVCSVTDFYPGQIKVRWFWNDQEETAGVVSTPLIRNGDWTFQILVMLEMTPQRGDVYTCRVEHPSLQSPITVEWRAQSESAQSKMLSGIGGFVLGLIFLGLGLIIRHRSQKGPRGSPPAGLLH---
>Odro-DQB_LOC101370503_na Odobenus rosmarus divergens isolate Ivan unplaced genomic scaffold, Oros_1.0 Scaffold2419, whole genome shotgun sequence
MMPGKMALRIPRGLWTAA--EMMILVVLSIPVAEGRDSPQNFVYQFKGECYFTNGTERVRHLTRYIYNREEYARFDSDVGEYRPVTELGRPDTEYWNSQKDVVEQTRAEVDTVCRHNYGI-EERTTLQRRVEPTVTISPSRTEVLNHHNLLVCSVTDFYPGQIKVQWFRNDQEETAGVVSTPLIRNGDWTFQILVMLEITPQRGDVYTCHVEHPSLQSPITVEWRAQSESAQSKMLSGIGGFVLGLIFLGLGLIIRHRSQKGPRGSLPAGLLH---
>Oraf-DQB_LOC103205998_nt Orycteropus afer afer isolate SDZICR_OR568_19922 unplaced genomic scaffold, OryAfe1.0 scaffold00294, whole genome shotgun sequence
-----MAPQIPRGLCTAA--VMMMLMILSTPKAEGIDSPKDFVFQGKCRCFFINGTERVKYVKRYIYNRMEVVRFDSDVGDYVPVTEVGRRSAEYWRSQKDVLERDRAELDTVCRHNYQI-ETFTTFRRLVEPTVTISPAKTEALNHHNLLICLVTDFYPGQIKVWWFRNNQEETAGVVSTSLIRNGDWTYQIHVMLEVTPQRGDVYTCRVEHPSLQSPITVDWQAQSESAQSKMLSGIGGFVLGLIFLGLGFIIHRRGQKGTPGPAPTGLLH---
>Oror-DQB_LOC101278540_IIa Orcinus orca isolate Morgan unplaced genomic scaffold, Oorc_1.1 Scaffold258, whole genome shotgun sequence
-MSGTVALQIPRGLWTTA--VMVMLTVLSTPEAEGRDSPQNFLFRHMGMCYFTNGTERVRGMSRYIYNREEFVRFDSDVGEFRAVTELGRPDAEYWNSQKDILEQERAAVDTVCRPNYRI-LETFTVQRRVEPTVTISPSRTEALNHHNLLVCSVTDFYPGQIKVRWFRNDQEETAGVVSTPLIRNGDWTFQMLVMLEMTPQQGDVYTCHVEHPSLQSPIMVEWWAQSGSAQSKMLSGVGGFVLGLIFLGLGVIIRHRSQKGPPGPPPAGH-----
>Phca-DQB_LOC102976012_IIa Physeter catodon isolate SW-GA unplaced genomic scaffold, ASM283717v1 scaffold32, whole genome shotgun sequence
-MSGTVALQIPSGLWTTA--VMVMLTVLSTPGAKGRDSPQDFVVQHMGVCYFTNGTERVRYVTRYIYNREEHVRFDSDVGEYRAVTELGRPDAEYWNSQKDILERTRAELDTVCIHNYGV-VESFTVQRRVEPTVTISPSKTEALNHHNLLVCSVADFYPGQIKVRWFRNDQEETAGIVSTPLIRNGDWTFQMLVMLEMTPQQGDIYTCRVEHPSLQSPITVEWRAQSGSAQSKMLSGVGGFVLGLIFLGLGLIIRHRSQKG--------LVH---
>Ptal-DQB_LOC102883801_nt Pteropus alecto unplaced genomic scaffold, ASM32557v1 scaffold202, whole genome shotgun sequence
-----MTVTILRNPWTVAGIVMVILMVLRTPMAHCRGVPKDFVYQFKGMCYFTNGTERVRLVARQIYNKEEIVRFDSDVGMFVAVTELGRSNAQSWNSQKDLLAQYRAQVDTLCRHNYKE-TAQFTVQRREEPTVTISPARTEFLNHHNLLVCMVTNFYPRQIKVRWFRNKLEEKAGVVSTPLIQNGDWTYQILVMLEIVPQRGDVYICHVDHSSLQRPITVEWRAQSESAQSKMLSGIEGFVLGLISFGLGFIIHLWNMK---------------
>Ptal-DQB_LOC102895566_nt Pteropus alecto unplaced genomic scaffold, ASM32557v1 scaffold202, whole genome shotgun sequence
-MSGMMALQIPRGLWTAA--VMVTLVVLSTPVAEGRDSPQDFVYQFKSYCYFTNGTERVRLLNRYVYNLEEYVGFDSDVGEFRAVTELGRHTAEYWNSQADILEQTRAVVDTVCRHNYQL-ETHMSLKRRVIPTVTVSPSKTEALNHHNLLVCSVTDFYPGQIKVRWFRNDQEETAGIVSTPLIRNGDWTFQIIVMLEMTPQQGDVYTCHVEHPSLQSPTTVEWRAQSESAQSKMLSGVGGFVLGLIFLVLGLFIRHRKQKG--------LLH---
>Trma-DQB_LOC101345015_nt LOC101345015: boLa class II histocompatibility antigen, DQB*0101 beta chain-like
-MSEKMALQIPRGLWTAA--VMVMLMLLSIPKAEGRDSPQDFVVQDKFLCYFTNGTERVRLVHRDIYNREEIARFDSDVGNYVALTPLGRPDAEYWNSQKDILEEKRAYVDTVCRHNYRI-EERFTVQRRVEPEVTISLAKTETLNHHNLLICSVTDFYPGQVKVRWFRNDQEETAGVVSTPLIRNGDWTFQILVMLEMTPQRGDVYTCRVEHPSLRSPITVEWRAQSESAQSKMLSGVGGFVLGLIFLGLGLIIHHRNQKGPHGTPPTGLLH---
>Tutr-DQB_101329439_IIa Tursiops truncatus isolate MMES2002162SC unplaced genomic scaffold, NIST Tur_tru v1, whole genome shotgun sequence
-MSGTVALQIPRGLWTTA--VMVMLTVLSTPEAEGRDSPQNFLYRNMGMCYFTNGTERVRFVDRYIYNREEFVRFDSDVGEHRAVTELGRPDAEYWNSQKDILERKRAELDTVCRHNYRV-DETFTVQRRVEPTVTISPARTEALNHHNLLVCTVTDFYPGQIKVRWFRNDQEETAGVVSTPLIRNGDWTFQMLVMLEMTPQQGDVYTCQVEHPSLQSPIMVEWWAQSGSAQSKMLSGVGGFVLGLIFLGLGLIIRHRSQKGPPGPPPAGH-----
